# Supplementary material for: Highly sensitive glutathione assay and intracellular imaging with functionalized semiconductor quantum dots
Source: Royal Society of Chemistry journal article supplement (doi:10.1039/c8nr09801h), 2019-01-01
Supplement: c8nr09801h2.pdf [file c8nr09801h2.pdf]

# Highly Sensitive Glutathione Assay and Intracellular Imaging with Functionalized Semiconductor Quantum Dots

Junlin Sun, Feng Liu, Wenqian Yu, Qunying Jiang, Jialing Hu, Yahua Liu, Fuan Wang, Xiaoqing

Liu\*

Key Laboratory of Analytical Chemistry for Biology and Medicine (Ministry of Education),

College of Chemistry and Molecular Sciences, Wuhan University, Wuhan 430072, P. R. China

\* To whom correspondence should be addressed. E-mail: xiaoqingliu@whu.edu.cn.

## Supporting Information

### Table of Contents

|                                                                                                                                              |     |
|----------------------------------------------------------------------------------------------------------------------------------------------|-----|
| <b>Fig. S1</b> Hydrodynamic diameter and zeta potential of QD@SiO <sub>2</sub> and QD@SiO <sub>2</sub> -MnO <sub>2</sub> .....               | S2  |
| <b>Fig. S2</b> EDS spectrum of QD@SiO <sub>2</sub> -MnO <sub>2</sub> .....                                                                   | S3  |
| <b>Fig. S3</b> Excitation, emission spectra of QD and QD@SiO <sub>2</sub> .....                                                              | S4  |
| <b>Fig. S4</b> Relative quantum yields of QD and QD@SiO <sub>2</sub> .....                                                                   | S5  |
| <b>Fig. S5</b> UV-vis absorption spectra of KMnO <sub>4</sub> and MnO <sub>2</sub> .....                                                     | S6  |
| <b>Fig. S6</b> Absorption spectra and zeta potential of QD@SiO <sub>2</sub> subjected to different concentrations of KMnO <sub>4</sub> ..... | S7  |
| <b>Fig. S7</b> Fluorescent quenching of the QD@SiO <sub>2</sub> by different preparation routes.....                                         | S8  |
| <b>Fig. S8</b> Fluorescence restoration ability of the nanoprobe toward GSH .....                                                            | S9  |
| <b>Fig. S9</b> Kinetics of GSH sensing by optical spectra and ICP-MS .....                                                                   | S10 |
| <b>Fig. S10</b> TEM images of QD@SiO <sub>2</sub> -MnO <sub>2</sub> in the absence and presence of GSH.....                                  | S11 |
| <b>Fig. S11</b> Confocal images of of nanoprobe or cells for control .....                                                                   | S12 |
| <b>Fig. S12</b> Variation of intracellular GSH upon NEM treatment .....                                                                      | S13 |
| <b>Fig. S13</b> Intracellular imaging of GSH variation in MCF-7 cells .....                                                                  | S14 |
| <b>Table S1</b> Performance of different methods for fluorescent assay of GSH. ....                                                          | S15 |
| <b>Reference</b> .....                                                                                                                       | S16 |

## Supporting Information

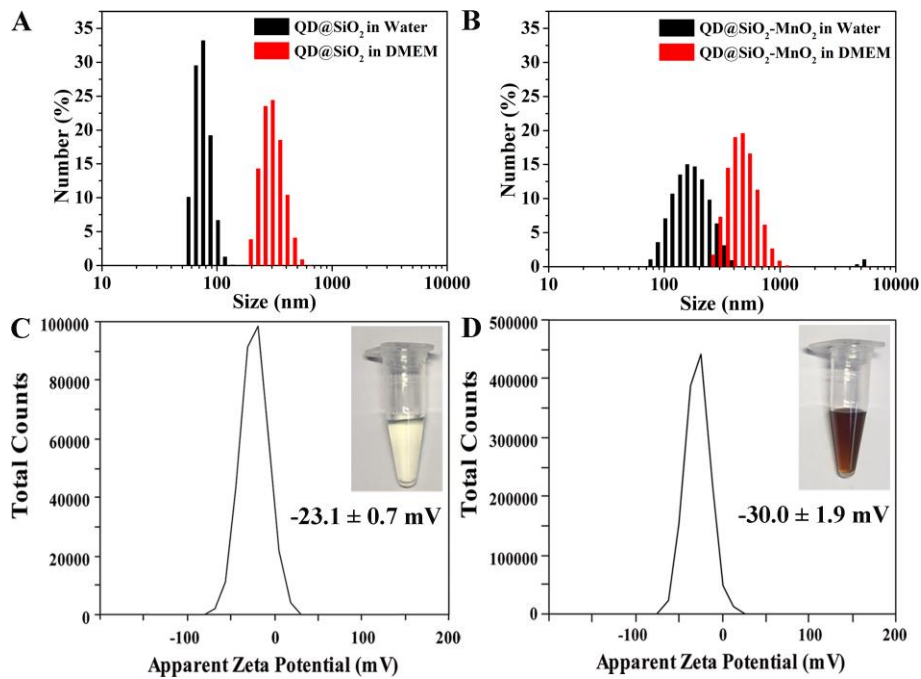

**Fig. S1** Hydrodynamic diameter of QD@SiO<sub>2</sub> (A) and QD@SiO<sub>2</sub>-MnO<sub>2</sub> (B) in water and DMEM. Zeta potential of QD@SiO<sub>2</sub> (C) and QD@SiO<sub>2</sub>-MnO<sub>2</sub> (D). Inset: corresponding photograph of the particle solution.

## Supporting Information

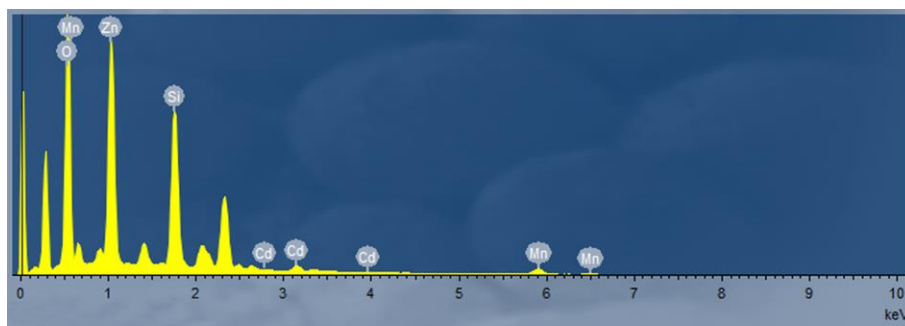

**Fig. S2** Energy-dispersive X-ray spectroscopy (EDS) spectrum of QD@SiO<sub>2</sub>-MnO<sub>2</sub>.

## Supporting Information

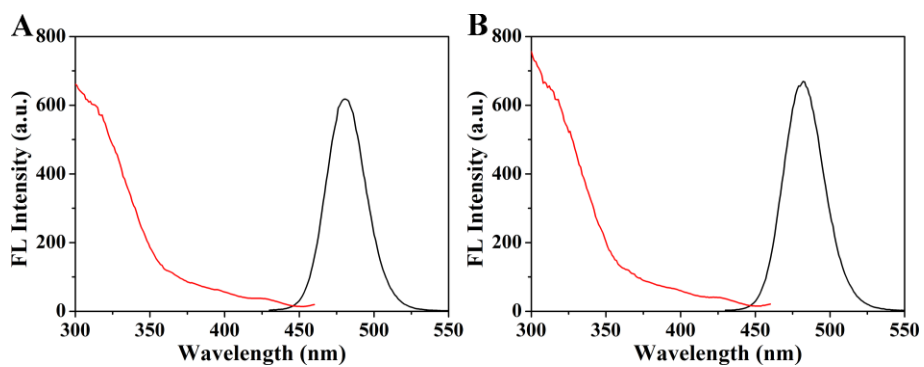

**Fig. S3** Fluorescence excitation (red line) and emission (black line) spectra of QD in toluene (A) and QD@SiO<sub>2</sub> in water (B).

## Supporting Information

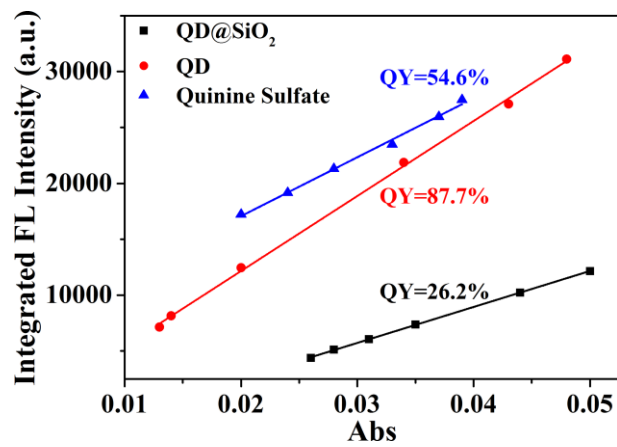

**Fig. S4** Calculation of relative photoluminescence quantum yields of QD and QD@SiO<sub>2</sub> using standard quinine sulfate (QS). Corresponding linear equation:  $y_{\text{QD}} = 671117.0619x - 1263.91762$ ,  $R^2 = 0.9986$ ;  $y_{\text{QD@SiO}_2} = 321620.65124x - 3917.02263$ ,  $R^2 = 0.9998$ ;  $y_{\text{QS}} = 526928.40956x - 6530.24365$ ,  $R^2 = 0.9938$ .

## Supporting Information

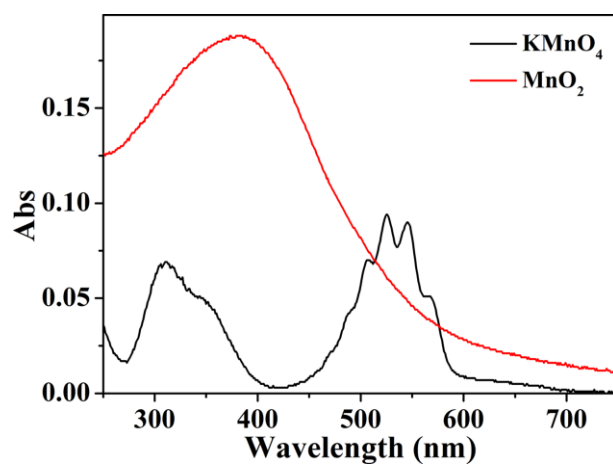

**Fig. S5** UV-vis absorption spectra of aqueous solutions of  $\text{KMnO}_4$  and  $\text{MnO}_2$  nanosheets.

## Supporting Information

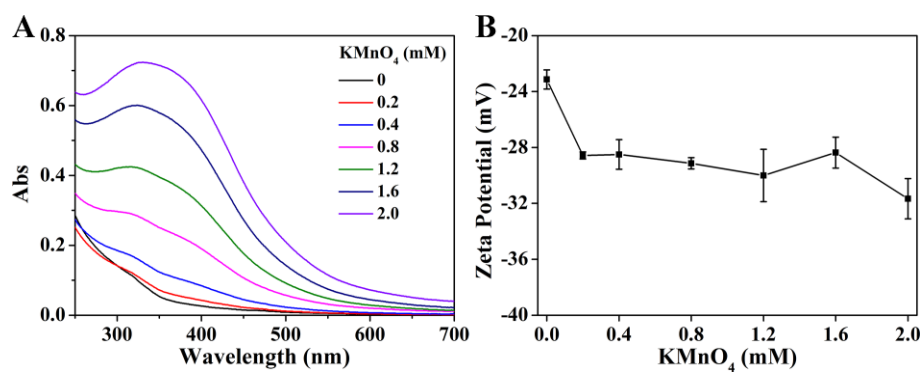

**Fig. S6** UV-vis absorption spectra (A) and zeta potential (B) of QD@SiO<sub>2</sub> in the presence of different concentrations of KMnO<sub>4</sub> (0, 0.2, 0.4, 0.8, 1.2, 1.6 and 2 mM).



## Supporting Information

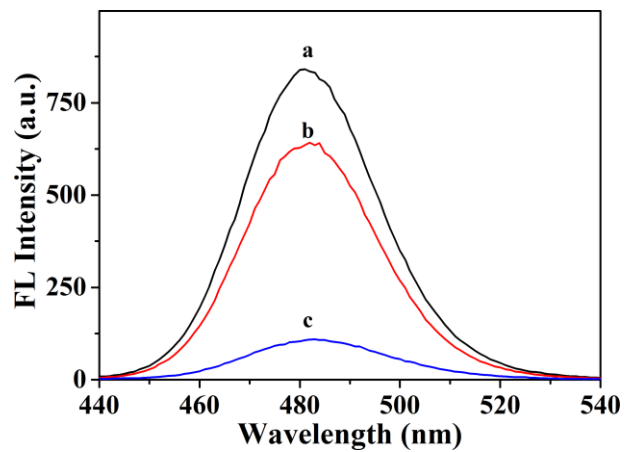

**Fig. S7** Fluorescent quenching of the QD@SiO<sub>2</sub> by different preparation routes for the nanoprobe. (a) Pristine QD@SiO<sub>2</sub>. (b) Nanoprobe prepared by physical mixing QD@SiO<sub>2</sub> and MnO<sub>2</sub>. (c) Nanoprobe (QD@SiO<sub>2</sub>-MnO<sub>2</sub>) prepared by in-situ growth of MnO<sub>2</sub> on the surface of QD@SiO<sub>2</sub>. The respective concentrations of QD and MnO<sub>2</sub> were the same.

## Supporting Information

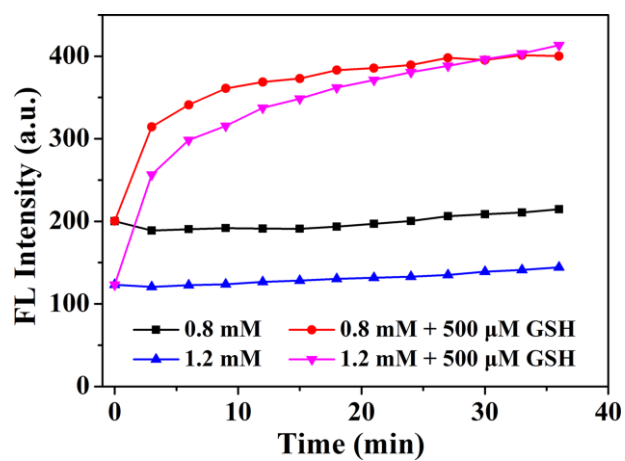

**Fig. S8** Fluorescence restoration ability of the QD@SiO<sub>2</sub>-MnO<sub>2</sub> toward 500 μM GSH. The nanoprobe was prepared separately using 0.8 and 1.2 mM KMnO<sub>4</sub>.

## Supporting Information

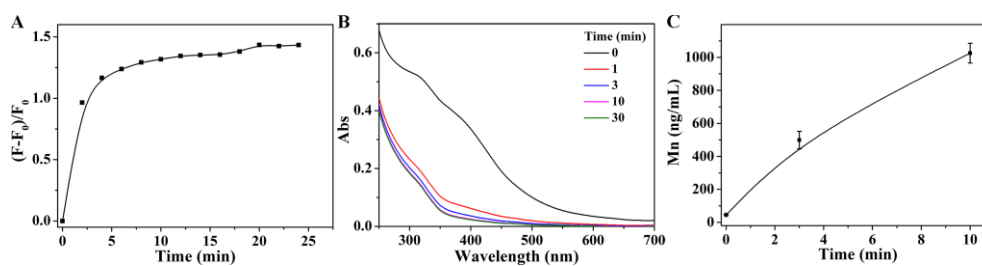

**Fig. S9** Dynamic reaction between QD@SiO<sub>2</sub>-MnO<sub>2</sub> and 500 μM GSH followed by time-dependent fluorescence restoration (A), absorbance variation (B), and ICP-MS (C).

## Supporting Information

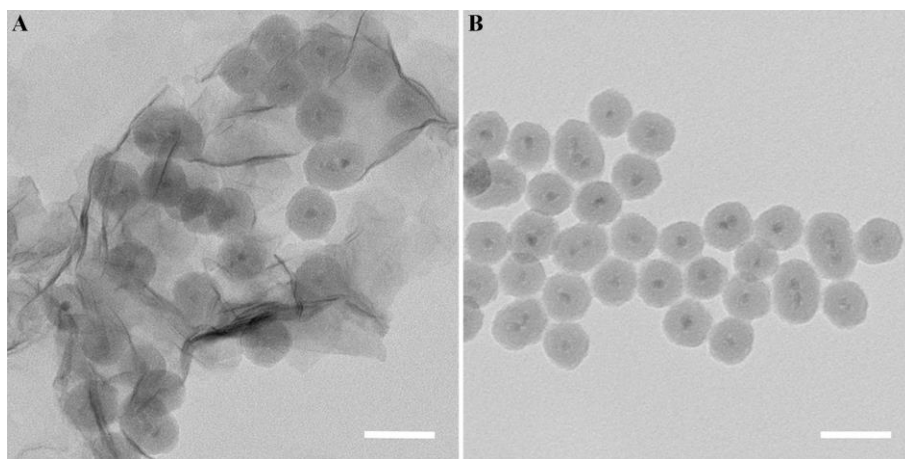

**Fig. S10** TEM images of QD@SiO<sub>2</sub>-MnO<sub>2</sub> in the absence (A) and presence (B) of 500  $\mu$ M GSH.

Scale bar, 50 nm.

## Supporting Information

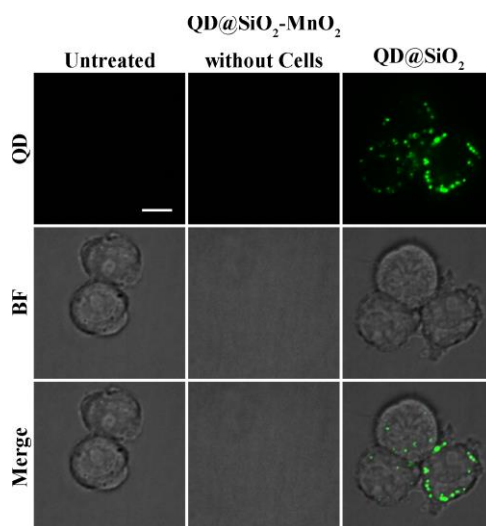

**Fig. S11** Confocal images of nanoprobe or cells. First column: RAW264.7 cells without treatment. Second column: QD@SiO<sub>2</sub>-MnO<sub>2</sub> incubated in DMEM without cells for 4 h. Third column: RAW264.7 cells incubated with QD@SiO<sub>2</sub> for 4 h. Scale bar, 7  $\mu$ m.

## Supporting Information

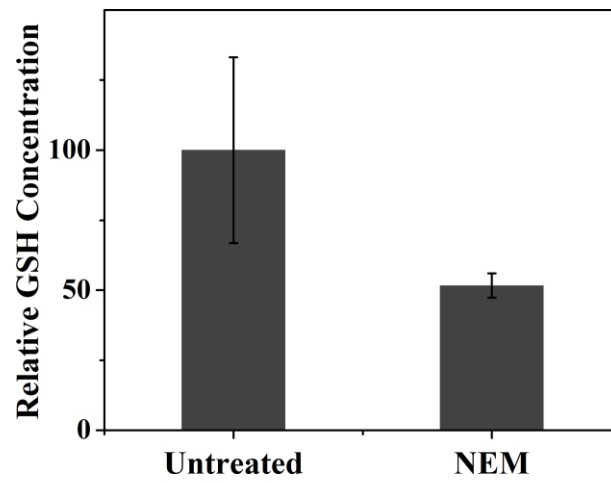

**Fig. S12** Variation of intracellular GSH in RAW264.7 cells pretreated with NEM (10  $\mu$ M) for 20 min. The GSH level was measured using Ellman's reagents.

## Supporting Information

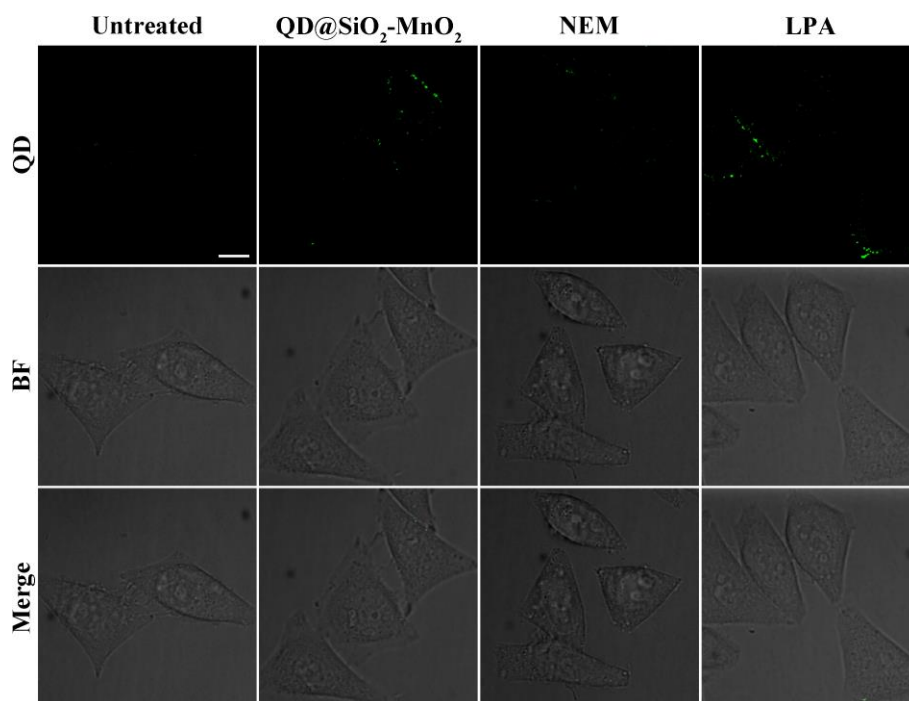

**Fig. S13** Intracellular imaging of GSH variation in MCF-7 cells with different treatments by confocal laser scanning microscopy. (A) Untreated cells in the absence of QD@SiO<sub>2</sub>-MnO<sub>2</sub>. (B) Cells incubated with QD@SiO<sub>2</sub>-MnO<sub>2</sub>. (C) Cells pretreated with NEM (10  $\mu$ M) for 20 min followed by incubation with QD@SiO<sub>2</sub>-MnO<sub>2</sub>. (D) Cells pretreated with LPA (500  $\mu$ M) for 24 h followed by incubation with QD@SiO<sub>2</sub>-MnO<sub>2</sub>. Scale bar, 12  $\mu$ m.

## Supporting Information

**Table S1** Comparison of different methods for fluorescent assay of GSH.

| Methods                                                         | Detection limit ( $\mu\text{M}$ ) | Linear range ( $\mu\text{M}$ ) | Ref.      |
|-----------------------------------------------------------------|-----------------------------------|--------------------------------|-----------|
| TCF-GSH                                                         | 0.28                              | /                              | 1         |
| AuNC                                                            | 0.2                               | 150-1200                       | 2         |
| g-C <sub>3</sub> N <sub>4</sub> -MnO <sub>2</sub> nanocomposite | 0.2                               | /                              | 3         |
| Eu(DPA) <sub>3</sub> @Lap-Tris/Cu <sup>2+</sup> system          | 0.162                             | 0.5-100                        | 4         |
| Bis-Pyrene-Cu(II)                                               | 0.16                              | /                              | 5         |
| Iridium(III) complex                                            | 0.13                              | 1-200                          | 6         |
| Au-MOF                                                          | 0.1                               | 0-10000                        | 7         |
| CQDs-AuNPs                                                      | 0.05                              | 0.1-0.6                        | 8         |
| QD@SiO <sub>2</sub> -MnO <sub>2</sub>                           | 0.01                              | 0.01-120                       | This work |



## Supporting Information

### References

- (1) Sedgwick, A. C.; Gardiner, J. E.; Kim, G.; Yevglevskis, M.; Lloyd, M. D.; Jenkins, A. T. A.; Bull, S. D.; Yoon, J.; James, T. D. Long-Wavelength TCF-Based Fluorescence Probes for the Detection and Intracellular Imaging of Biological Thiols. *Chemical Communications* **2018**, *54* (38), 4786-4789.
- (2) Zhang, X.; Wu, F. G.; Liu, P.; Gu, N.; Chen, Z. Enhanced Fluorescence of Gold Nanoclusters Composed of HAuCl<sub>4</sub> and Histidine by Glutathione: Glutathione Detection and Selective Cancer Cell Imaging. *Small* **2014**, *10* (24), 5170-5177.
- (3) Zhang, X. L.; Zheng, C.; Guo, S. S.; Li, J.; Yang, H. H.; Chen, G. Turn-On Fluorescence Sensor for Intracellular Imaging of Glutathione Using g-C<sub>3</sub>N<sub>4</sub> Nanosheet-MnO<sub>2</sub> Sandwich Nanocomposite. *Analytical Chemistry* **2014**, *86* (7), 3426-3434.
- (4) Chen, X.; Wang, Y.; Chai, R.; Xu, Y.; Li, H.; Liu, B. Luminescent Lanthanide-Based Organic/Inorganic Hybrid Materials for Discrimination of Glutathione in Solution and within Hydrogels. *ACS Applied Materials & Interfaces* **2017**, *9* (15), 13554-13563.
- (5) Hu, Y.; Heo, C. H.; Kim, G.; Jun, E. J.; Yin, J.; Kim, H. M.; Yoon, J. One-Photon and Two-Photon Sensing of Biothiols Using a Bis-Pyrene-Cu(II) Ensemble and Its Application to Image GSH in the Cells and Tissues. *Analytical Chemistry* **2015**, *87* (6), 3308-3313.
- (6) Dong, Z. Z.; Lu, L.; Ko, C. N.; Yang, C.; Li, S.; Lee, M. Y.; Leung, C. H.; Ma, D. L. A MnO<sub>2</sub> Nanosheet-Assisted GSH Detection Platform Using an Iridium(iii) Complex as a Switch-On Luminescent Probe. *Nanoscale* **2017**, *9* (14), 4677-4682.
- (7) Du, T.; Zhang, H.; Ruan, J.; Jiang, H.; Chen, H. Y.; Wang, X. Adjusting the Linear Range of Au-MOF Fluorescent Probes for Real-Time Analyzing Intracellular GSH in Living Cells. *ACS Applied Materials & Interfaces* **2018**, *10* (15), 12417-12423.
- (8) Shi, Y.; Pan, Y.; Zhang, H.; Zhang, Z.; Li, M. J.; Yi, C.; Yang, M. A Dual-Mode Nanosensor Based on Carbon Quantum Dots and Gold Nanoparticles for Discriminative Detection of Glutathione in Human Plasma. *Biosensors & Bioelectronics* **2014**, *56*, 39-45.
